# Supplementary material for: Perceptions of cervical cancer prevention among a group of ethnic minority women in Denmark—A qualitative study
Source: PubMed Central journal article supplement (PMC8168878; doi:10.1371/journal.pone.0250816), 2021-06-01
Supplement: pone.0250816.s005.pdf [file pone.0250816.s005.pdf]

Besvar | ▾

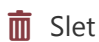

Slet

Uønsket | ▾

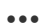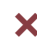

## SV: Att: Shanna Mejland-Munch. Skriftlig forespørgsel vedr. videnskabelig projekt

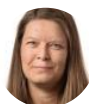**Annette Engsig**

ti 28-02-2017, 14:12

Sara Koed Badre-Esfahani ▾

Besvar | ▾

VEK

Markér til opfølgning. Start den 17. juni 2019. Forfalder den 17. juni 2019.

Du videresendte denne meddelelse den 04-05-2020 09:55

### Forespørgsel 1/2017

Kære Sara

Du har spurgt De Videnskabsetiske Komitéer for Region Midtjylland om nedenfor beskrevne projekt skal anmeldes til komitéen.

Registerforskning, samt spørgeskemaundersøgelser er undtaget fra anmeldelse i medfør af komitéloven § 14, stk. 2.

Komitéen finder efter en konkret vurdering, at projektet ikke kan betragtes som et sundhedsvidenskabeligt forskningsprojekt, jf. definitionen i komitéloven § 2, nr. 1, og projektet skal derfor ikke anmeldes til komitéen, jf. samme lov § 14, stk. 1.

Du kan derfor gennemføre projektet uden en godkendelse fra komitéen. Du skal være opmærksom på, at du muligvis skal have en godkendelse fra Styrelsen for Patientsikkerhed og/eller Datatilsynet.

Den omtalte lov er lov nr. 593 af 14. juni 2011 om videnskabsetisk behandling af sundhedsvidenskabelige forskningsprojekter.

Med venlig hilsen

Annette Engsig  
Sekretær  
Juridisk Kontor - De Videnskabsetiske Komitéer for Region Midtjylland

Tel. +45 7841 0185  
Annette.Engsig@stab.rm.dk

Regionssekretariatet - Region Midtjylland  
Skottenborg 26 - DK-8800 Viborg

**Fra:** Sara Koed Badre-Esfahani [sarabadr@rm.dk]  
**Sendt:** 04-01-2017 13:43  
**Til:** Komite (Funktionspostkasse) [Komite@rm.dk]  
**Cc:** Marianne Rævsbæk Pedersen [MARAPE@rm.dk]  
**Emne:** Att: Shanna Mejland-Munch. Skriftlig forespørgsel vedr. videnskabelig projekt

Kære Shanna Majland-Munch  
Hermed en kort beskrivelse af mit ph.d. projekt. Vil tage stilling til hvorvidt projektet kræver godkendelse fra VEK eller ej.  
Mange tak

Vh  
Sara Koed Badre-Esfahani

Besvar | ▾  Slet Uønsket | ▾ ...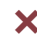

er der nu en vaccine tilgængelig for beskyttelse, som kan reducere forekomsten af livmoderhalskræft med 70 %. den nærmeste fremtid frigives at en ny og mere dækkende vaccine, som beskytter op mod 90 % af tilfælde af livmoderhalskræft. Indtil hele populationen kan blive beskyttet af vaccine, må borgerne være opmærksomme på, at deltagelse i screening for livmoderhalskræft er essentiel for rettidig påvisning og behandling af kræft og -forstadier i livmoderhalsen.

Internationale forskere har udtrykt bekymring for at de HPV-vaccinerede kvinder vil være mindre tilbøjelige til at vælge screeningsundersøgelse efter vaccination. Der er endnu få internationale studier som har undersøgt sammenhængen mellem deltagelse i HPV-vaccination og efterfølgende deltagelse i livmoderhalskræftscreening. Det forestående ph.d. projekt bliver den første nationale danske undersøgelse, der belyser denne sammenhæng.

Nærværende ph.d. studie har som overordnet **formål** at indsamle viden om screeningsdeltagelse hos kvinder i screeningsalderen set i forhold til, om de har til- eller fravalgt HPV-vaccination.

At undersøge associationer mellem valg af HPV-vaccination og efterfølgende deltagelse i screening for livmoderhalskræft hos danske kvinder, der fik tilbud om HPV-vaccination som voksne (*kohorte studie 1*).

At undersøge associationer mellem valg af HPV-vaccination og efterfølgende deltagelse i screening for livmoderhalskræft hos danske kvinder, der fik tilbud om HPV-vaccination som børn (*kohorte studie 2*).

At undersøge motiver for (allerede udført) valg og fravalg af livmoderhalskræftscreening blandt HPV-vaccinerede danske kvinder (*interview studie*).

**Kohorte 1.** Lukket kohorte studie bestående af alle kvinder født i perioden 1985-1992 og bosat i Danmark i perioden 27. august 2012 til 31. december 2013. *Studieperiode:* 27. August 2012 til 31. December 2013.

Eksponeret defineres som modtagelse af minimum en dosis HPV vaccination. Outcome defineres som "deltagelse i screening" ved den første registrerede undersøgelse med prøve af livmoderhalsen. Ved manglende børsteprøve d. 31. december 2016, defineres en borger som "ikke-deltaget". Den detaljerede statistiske analyseplan er under udarbejdelse i samarbejde med biostatistikere ved Aarhus Universitet. Den primære analysemodel bliver en logistisk regression og den sekundære bliver en Poisson regression.

**Kohorte 2.** Design, eksponering, outcome, metode, datakilder og statistiske analyser er de samme som i kohortestudie 1. *Populationen* er alle kvinder født 1993 og bosat i Danmark i 1. januar 2009- 31. december 2015. *Studieperiode:* 1. januar 2009 til 31. december 2019.

Data udtrækkes fra Landspatientregisteret (LPR), Cancerregisteret (CAR), CPR-registret (CPR), Sygesikringsregisteret (SSR), Landsregisteret for Patologi (PAT) samt Lægemiddeldatabasen. Outcome i de to registerbaserede studier er screeningsdeltagelse målt som registreret cytologisk materiale taget fra livmoderhalsen indenfor 1,5 år efter follow-up start.

**Interviewstudie.** *Design:* Interview studie *Materiale, Datakilde og Metode:* I den fase udvikles viden om HPV-vaccinerede kvinders sundheds- og sygdomsopfattelser, samt personlige overvejelser vedrørende deltagelse i screeningsprogrammet for livmoderhalskræft. Fundene fra fase 3 forventes således både at fungere hypotese genererende samt forklarende i forhold til resultaterne af de første to kohortestudier. Der anvendes kvalitativ metode i form af henholdsvis fokusgruppe- og individuelle interviews. Den estimerede deltagelsesantal er 10-20 og disse udvælges strategisk via CPR registeret til at repræsentere regionale, kulturelle og socioøkonomiske forskelle i det danske samfund. Potentielle deltagere kontaktes via brev og såfremt der gives tilladelse, kontaktes de telefonisk med henblik på aftale om interview. *Dataanalyse* foretages ud fra en tekstanalytisk metode, hvor temaer udledes og fortolkes kritisk med inddragelse af undersøgelsens teoriramme om folkesundhed og brugerinvolvering(42-44) (47-49).
